# Supplementary material for: A co-axial structure composed of RuO2 on defective N-doped carbon nanotubes as a highly efficient electrocatalyst for overall water splitting
Source: Royal Society of Chemistry journal article supplement (doi:10.1039/d3qi02079g), 2023-12-07
Supplement: d3qi02079g1.pdf [file d3qi02079g1.pdf]

# Co-axial structure composed of RuO<sub>2</sub> on Defective N-doped Carbon Nanotubes as Highly Efficient Electrocatalyst for Overall Water Splitting

Wenqiang Li <sup>a</sup>, Bowen Guo <sup>ab</sup>, Ka Zhang <sup>a</sup>, Heng Zhang <sup>ac</sup>, Keqing Bu <sup>a</sup>, Haipeng Chen <sup>a</sup>, Xun Feng <sup>\*a</sup>

- a. College of Chemistry and Chemical Engineering, Luoyang Normal University, Luoyang, 471934, P. R. China, *E-mail:* [fengx@lynu.edu.cn](mailto:fengx@lynu.edu.cn)
- b. College of Chemistry and Pharmaceutical Engineering, Nanyang Normal University, Nanyang, 473601, P. R. China
- c. Science Island Branch of Graduate School, University of Science and Technology of China, Hefei, 230026, P. R. China

## **Experimental Section**

### **1.1 Materials and reagent**

Sodium tellurite ( $\text{Na}_2\text{TeO}_3$ , 99.5%, Alfa Aesar), melamine (99%, Acros Organics), hydrazine hydrate ( $\text{N}_2\text{H}_4$ , 64% v/v, Acros Organics), polyvinylpyrrolidone (PVP, K30, USB), sodium hydroxide (NaOH, Fisher Scientific), formaldehyde (37% v/v, Acros Organics), ammonia ( $\text{NH}_3$ , 35% in water, Acros Organics), ruthenium(III) chloride ( $\text{RuCl}_3$ , Strem Chemicals), and Pt/C (20 wt%, Alfa Aesar) were used as received without further purification. Water was supplied from a Barnstead Nanopure Water System (18.3 M $\Omega$  cm).  $\text{RuO}_2$  was purchased from Aladdin company.

### **1.2 Synthesis Te NWs and Te-MF polymer core-sheath nanofibers**

Te Nanowires (Te NWs) were prepared by a previous method.<sup>1</sup> Briefly, 0.5 g ascorbic acid (AA), 0.1 g CTAB and 56.9 mg  $\text{Na}_2\text{TeO}_3$  were added to a beaker filled with 40 mL distilled water. The mixture moved into 50 ml autoclave and maintained at 90°C for 10 hours in an oven. Finally, the product was collected, washed and dried in a vacuum chamber for 10 h.

A certain of Te NWs and 0.126 g of melamine was dissolved in 25ml water and introduced into a 50 mL round-bottom flask. After 30 minutes under magnetic stirring, Te NWs solution which contained 20  $\mu\text{L}$  0.2M NaOH, and 0.53 mL formaldehyde were injected into the mixture solution, followed by stirring at 120 °C for another 10h. The product was obtained by filtration, washing with water and ethanol, is denoted as Te-MF (melamine–formaldehyde (MF) polymer coated onto the surface of Te NWs).

### **1.3 Material Characterization**

The morphology of nanotubes can be observed by SEM (Hitachi S4800). All samples for the TEM analysis prepared by depositing a drop of the diluted suspension in ethanol on carbon film-coated copper grid. The high-resolution transmission electron microscopy (HRTEM, JEM-2010FEF) and a spherical aberration corrected Scanning Transmission Electron Microscope (AC-STEM, Titan G2 60-300 with image corrector) were conducted on an FEI TECNAI F20 microscope at an acceleration voltage of 200 kV. The crystal phase of as-prepared products was

determined by powder XRD using a PANalytical Empyrean, Netherlands X-ray diffractometer with Cu K $\alpha$  radiation source. X-Ray photoelectron spectroscopy (XPS) measurements were performed with a VG Scientific ESCALAB 210 electron spectrometer using Mg KR radiation under a vacuum of  $2 \times 10^{-8}$  Pa at 14 KV.

#### 1.4 Electrochemical Measurements

All electrochemical measurements were performed on CHI 660E electrochemical workstation in a standard 3-electrode with 2-compartment cell. A Glassy carbon electrode with 3mm diameter is working electrode. A saturated calomel electrode (SCE) is the reference electrode. A graphite plate or Pt wire was used as the counter electrode in HER test or OER electrochemical measurements. Polarization data were obtained at a scan rate of 5 mV s<sup>-1</sup>. In all measurements, the reference electrode was calibrated with respect to reversible hydrogen electrode (RHE).

To prepare the catalyst ink, 5 mg catalyst powder was ultrasonically dispersed in 1000  $\mu$ L mixed liquor (20  $\mu$ L Nafion ionomer solution, 490  $\mu$ L isopropanol and 490  $\mu$ L deionized water). Then a certain amount of the dispersion was loaded onto a glassy carbon electrode with 3 mm diameter (loading 0.7 mg cm<sup>-2</sup>). The obtained HER polarization curves were IR-compensated according to the following equation:  $E_c = E_m - IR$  (where  $E_c$  is the IR-compensated potential,  $E_m$  is the experimentally measured potential, R is the solution resistance). The long-term stability was tested by a potentiation method at fixed potentials or a fixed current.

The catalyst RuO<sub>2</sub>-DNCTs were loaded on GCE was used as both cathode and anode in a two-electrode configuration for overall water splitting. The LSV curves were obtained at a scan rate of 5 mV s<sup>-1</sup>. The chronopotentiometry experiment was conducted at 100 mA/cm<sup>2</sup> for 60 h.

The TOF (s<sup>-1</sup>) values were calculated with the following equation:

$$\text{TOF} = I/mnF$$

I: Current (A) during the linear sweep voltammetry (LSV) tests in 1 M KOH.

n: Number of active sites (mol). F: Faraday constant (C mol<sup>-1</sup>).

m: The factor  $1/m$  represents that  $m$  electrons are required to form one  $H_2/O_2$  molecule from water, which means that the  $m$  values for hydrogen evolution and oxygen evolution reactions are 2 and 4, respectively.

### 1.5 Theoretical calculation

Density functional theory (DFT) calculations were performed using a Dmol3 program package of software Materials Studio 7.0. The Perdew-Burke-Ernzerhof (PBE) function of the generalized gradient approximation (GGA) was used to account for electron exchange and correlation.<sup>2</sup> The computational parameters were self-consistent field (SCF) tolerance  $1.0 \times 10^{-7}$  Ha per atom, energy tolerance  $2.0 \times 10^{-7}$  Ha per atom, maximum force gradient  $0.002$  Ha  $\text{\AA}^{-1}$ , maximum atomic displacement  $0.005$   $\text{\AA}$ , orbital cutoff  $4.6$   $\text{\AA}$  and thermal smearing  $0.05$  Ha for quick convergence. The supercells were relaxed with a  $3 \times 3 \times 1$  Monkhorst-Pack k-mesh.

The four sequential electron transfer steps, including adsorption steps (i and iii), dissociation steps (ii and iv) and desorption step (v). Considering that the overall water decomposition process requires energy  $4.92$  eV at the standard conditions, the energy for at least one step in (i–iv) should be larger or equal to  $1.23$  eV. For the OER in alkaline environment, the whole process occurs via the following four elementary steps:

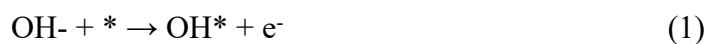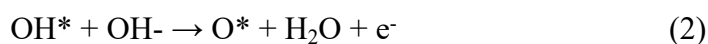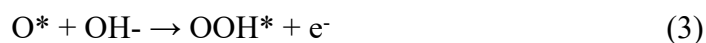



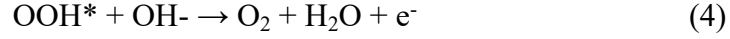

The adsorption free energies ( $\Delta G$ ) of OER intermediates can be obtained by  $\Delta G_i = \Delta E_i + \Delta \text{ZPE}_i - T\Delta S_i$ , where  $i$  means  $\text{OH}^*$ ,  $\text{O}^*$  and  $\text{OOH}^*$ . Li et al. previously reported that  $\Delta \text{ZPE} - T\Delta S$  are 0.06, 0.37 and 0.44 eV for  $\text{O}^*$ ,  $\text{OH}^*$  and  $\text{OOH}^*$ , respectively.<sup>3</sup> Furthermore, the  $\Delta E$  for OER intermediates was calculated as follow:

$$\Delta E_{\text{OH}} = E(\text{OH}^*) - E(^*) - [E(\text{H}_2\text{O}) - 1/2E(\text{H}_2)]$$

$$\Delta E_{\text{O}} = E(\text{O}^*) - E(^*) - [E(\text{H}_2\text{O}) - E(\text{H}_2)]$$

$$\Delta E_{\text{OOH}} = E(\text{OOH}^*) - E(^*) - [2E(\text{H}_2\text{O}) - 3/2E(\text{H}_2)]$$

Therefore, the Gibbs free energy changes for the four elementary steps of OER can be expressed as follows:

$$\Delta G_1 = \Delta G_{\text{OH}} - eU$$

$$\Delta G_2 = \Delta G_{\text{O}} - \Delta G_{\text{OH}} - eU$$

$$\Delta G_3 = \Delta G_{\text{OOH}} - \Delta G_{\text{O}} - eU$$

$$\Delta G_4 = 4.92 \text{ eV} - \Delta G_{\text{OOH}} - eU$$

Where  $U$  is the potential measured against the normal hydrogen electrode (NHE) at standard conditions. Therefore, the theoretical overpotential ( $\eta$ ) for OER can be obtained by the following equation:

$$\eta_{\text{OER}} = \max[\Delta G_1, \Delta G_2, \Delta G_3, \Delta G_4]/e - 1.23 \text{ [V]}$$

The adsorption energy was calculated as <sup>4</sup>:

$$E_{\text{ads}} = E_{\text{system}} - [E_{\text{slab}} + E_{\text{molecule}}] \quad (5)$$

$E_{\text{system}}$  is the total energy of the optimized system,  $E_{\text{slab}}$  is the total energy of the bare slab and  $E_{\text{molecule}}$  is the total energy of an isolated  $\text{RuO}_2$  or  $\text{H}_2\text{O}$  molecule.

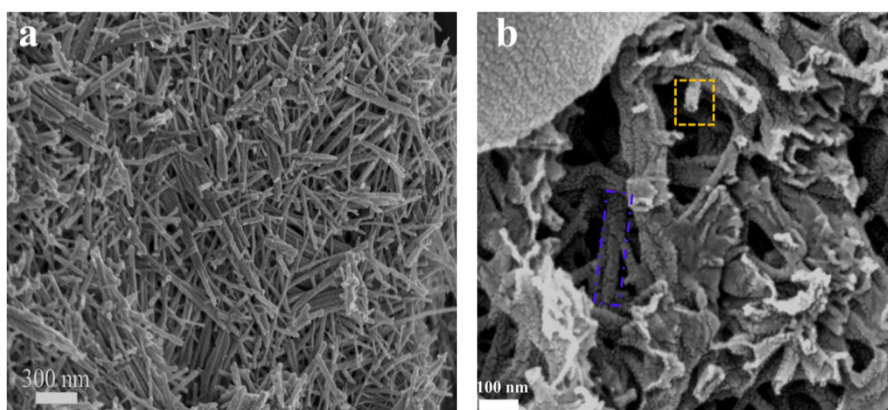

Fig. S1 (a-b) SEM image of Te nanowires and DNCTs.

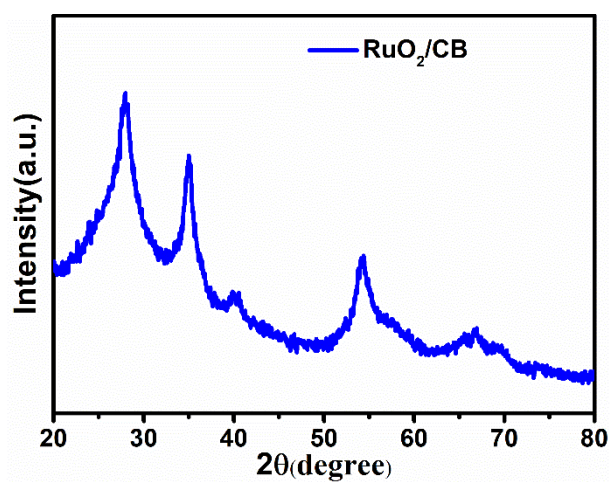

Fig. S2 XRD pattern of RuO<sub>2</sub>/CB.

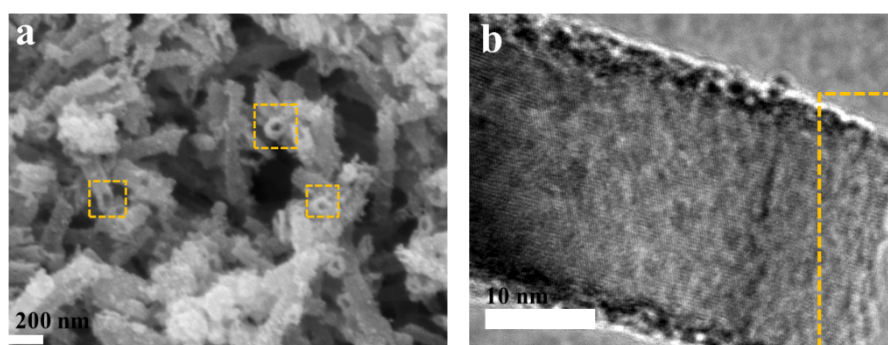

Fig. S3 SEM and TEM images of RuO<sub>2</sub>-DNCTs.

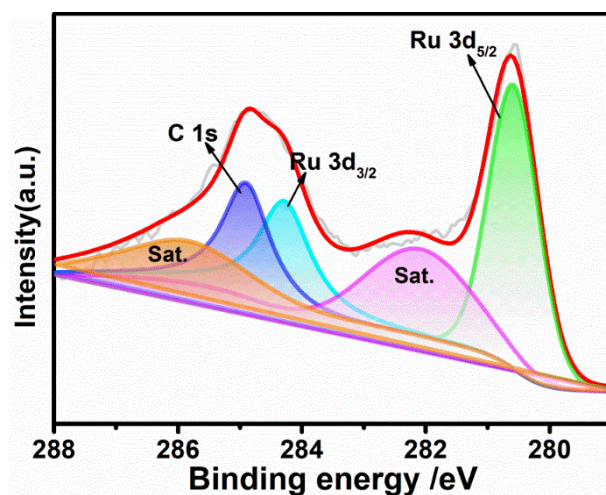

Fig. S4 High-resolution XPS spectra of Ru 3d in RuO<sub>2</sub>-DNCTs.

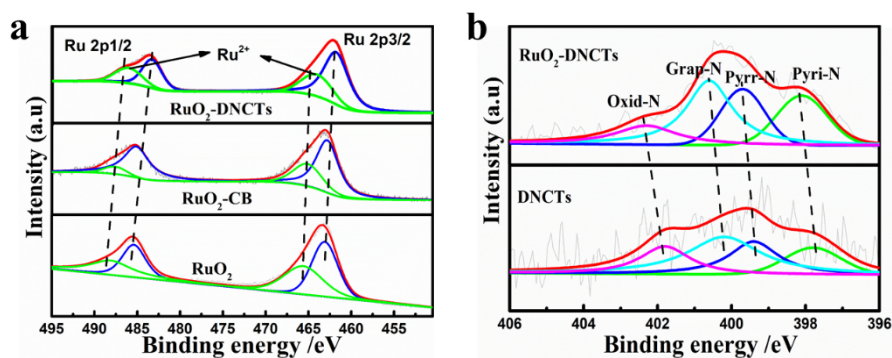

Fig. S5 (a) High-resolution XPS spectra of Ru 2p in RuO<sub>2</sub>-DNCTs, RuO<sub>2</sub>/CB and RuO<sub>2</sub>, (b) High-resolution XPS spectra of N 1s in RuO<sub>2</sub>-DNCTs and DNCTs.

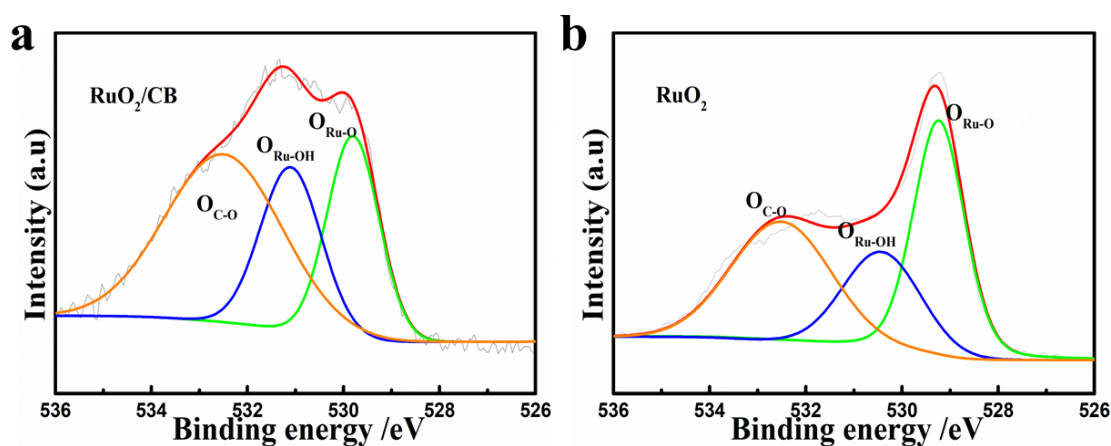

Fig. S6 High-resolution XPS spectra of O 1s in RuO<sub>2</sub>/CB and RuO<sub>2</sub>.

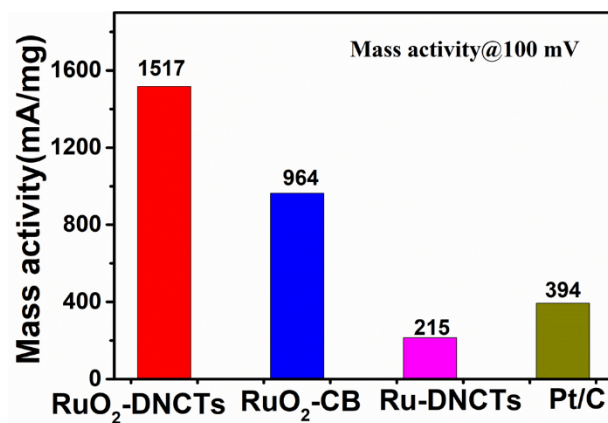

Fig. S7 Mass activity of HER performances for RuO<sub>2</sub>-DNCTs, Ru-DNCTs, RuO<sub>2</sub>/CB and Pt/C.

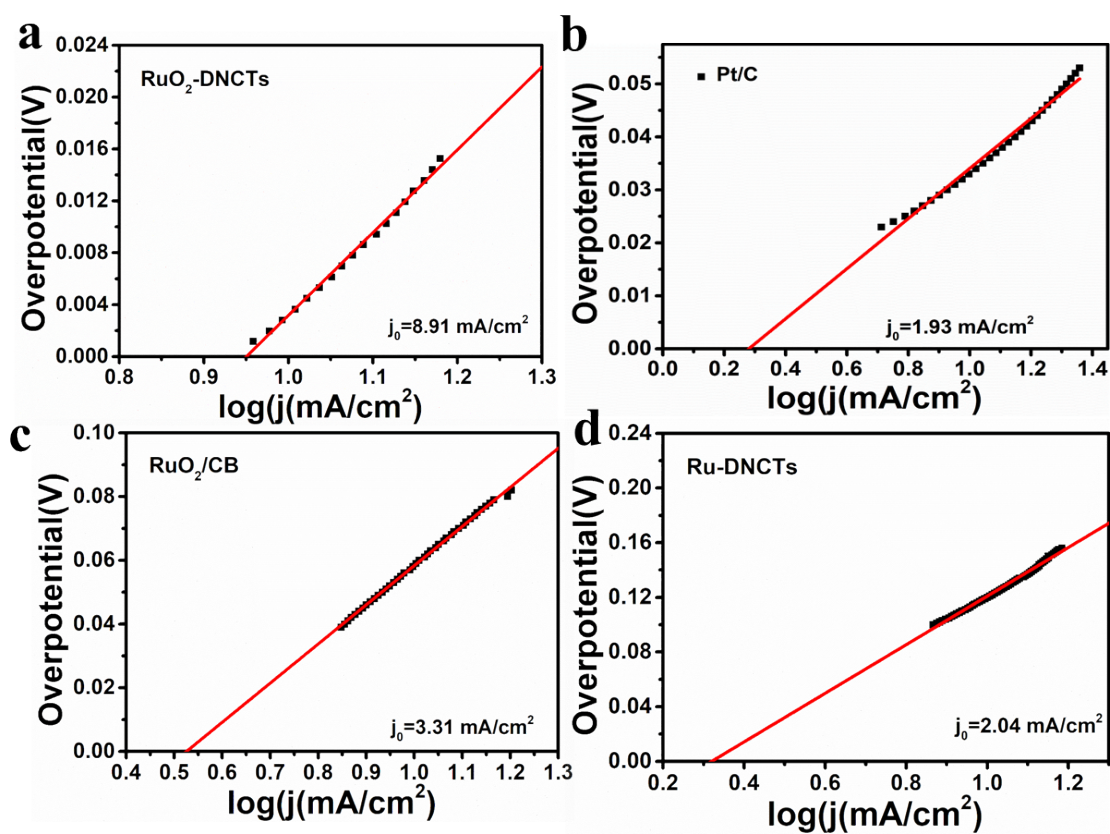

Fig. S8 (a-d) Exchange current densities ( $j_0$ ) of RuO<sub>2</sub>-DNCTs, Pt/C, RuO<sub>2</sub>/CB and Ru-DNCTs.



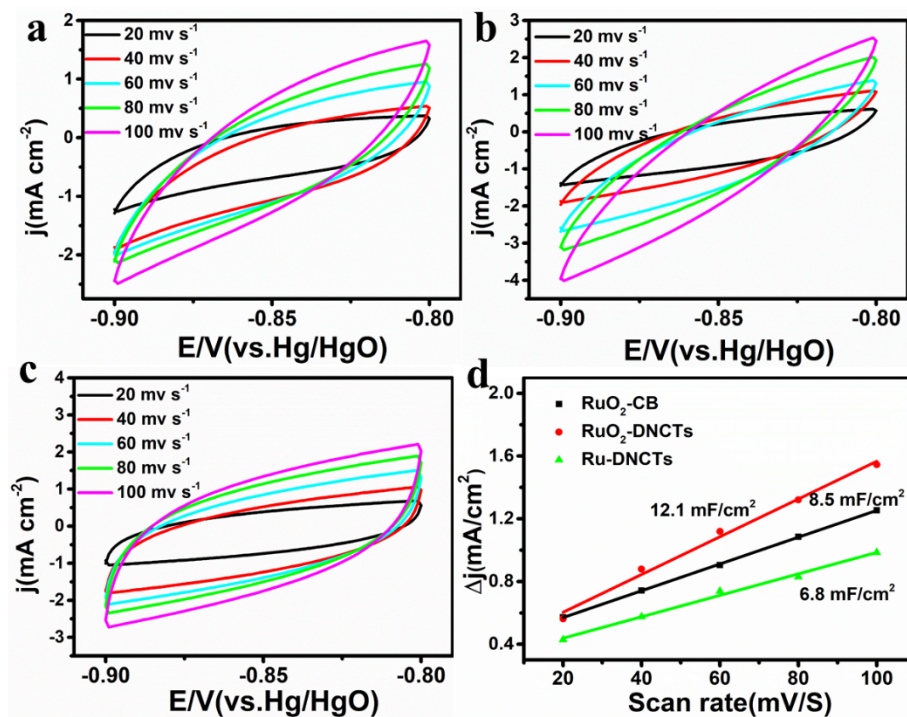

Fig. S9 (a-c) Cyclic voltammogram (CV) curves at different scan rates for RuO<sub>2</sub>/DCNTs, RuO<sub>2</sub>/CB and Ru/DCNTs. (d) The current density variation at 0.389 V versus RHE plotted against with the scan rates.

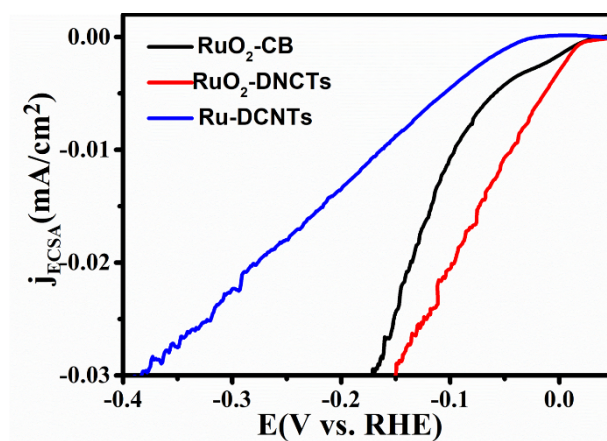

Fig.S10 ECSA normalized HER polarization curves of the as-prepared RuO<sub>2</sub>-DCNTs, RuO<sub>2</sub>/CB and Ru-DCNTs electrocatalysts.

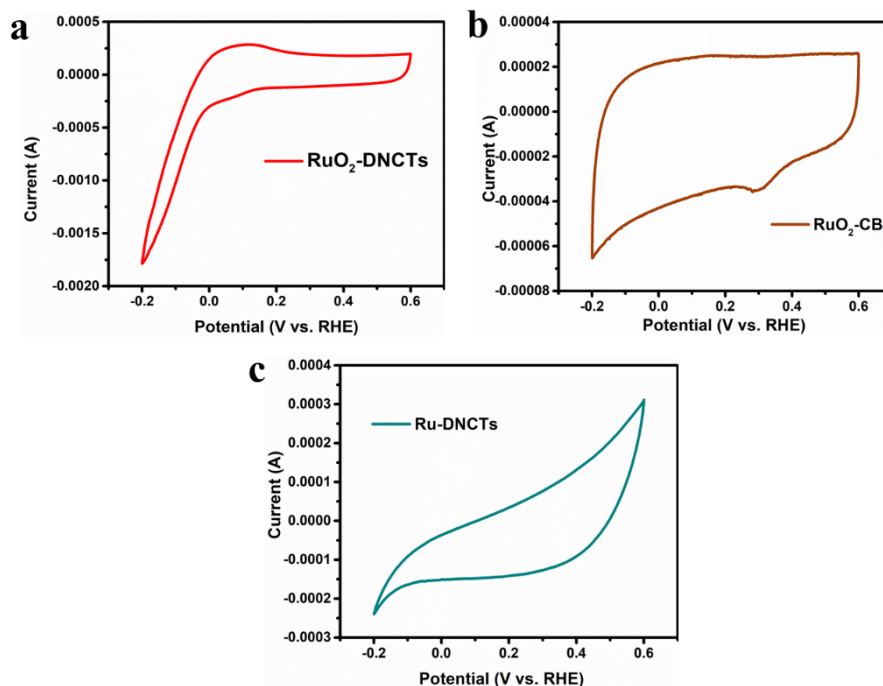

Fig. S11 Cyclic voltammogram (CV) curves of (a) RuO<sub>2</sub>-DNCTs, (b) RuO<sub>2</sub>/CB and (c) Ru-DNCTs in 1 M PBS (pH = 7) with a scan rate of 50 mV s<sup>-1</sup>.

According to the formula described in the experimental section:  $n = Q/2F = It/2F = IV/2Fv$ , the number of active sites for RuO<sub>2</sub>-DNCTs, RuO<sub>2</sub>/CB and Ru-DNCTs is calculated to be 2.91952e<sup>-8</sup> mol, 4.53e<sup>-9</sup> mol and 1.22783e<sup>-8</sup> mol, respectively, indicating that RuO<sub>2</sub>-DNCTs catalyst has more abundant active sites than RuO<sub>2</sub>/CB and Ru-DNCTs, respectively.

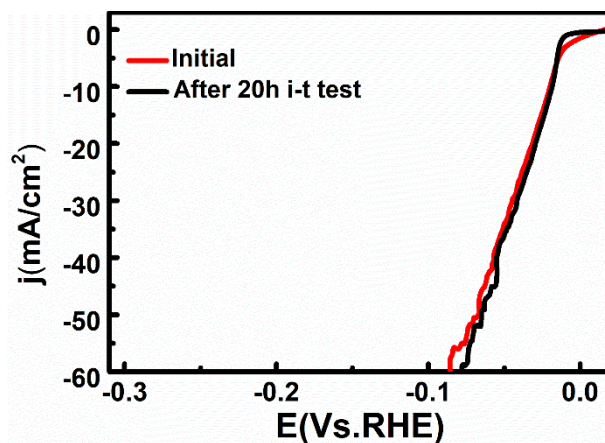

Fig. S12 LSV curves obtained initial and after 20 h i-t test for RuO<sub>2</sub>-DCNTs.

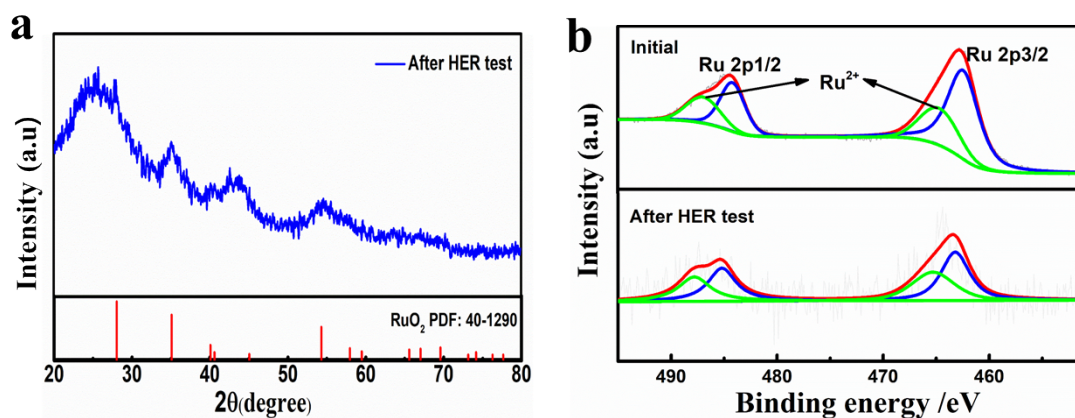

Fig. S13 X-ray diffraction pattern (XRD) and high-resolution XPS spectra of Ru 2p in RuO<sub>2</sub>-DNCTs after HER

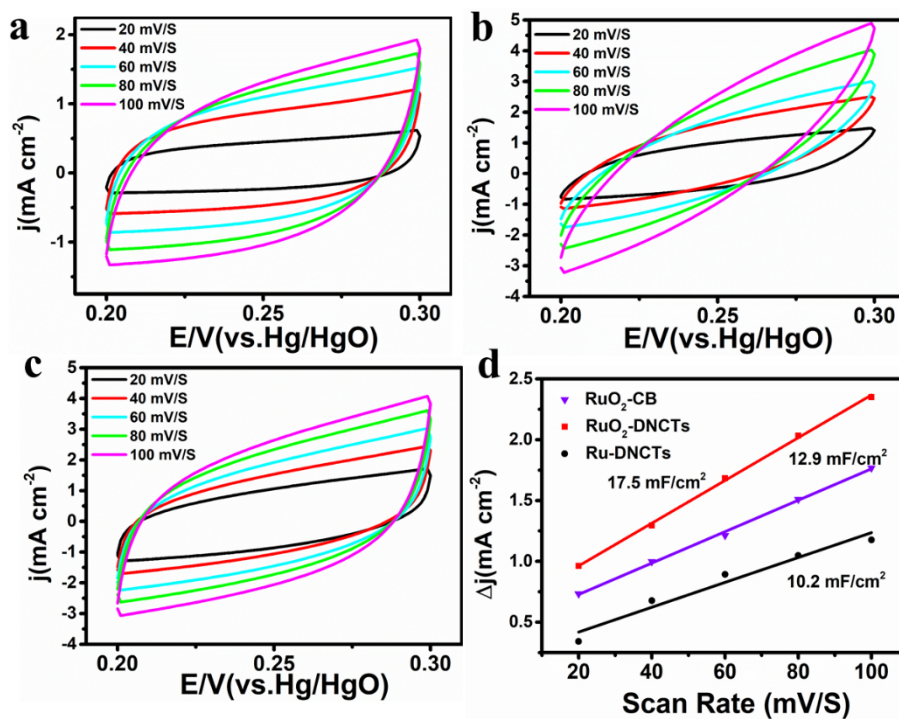

Fig. S14 (a-c) Cyclic voltammogram (CV) curves at different scan rates for RuO<sub>2</sub>-DNCTs, RuO<sub>2</sub>/CB and Ru-DNCTs, (d) The current density variation at 0.389 V versus RHE plotted against with the scan rates.



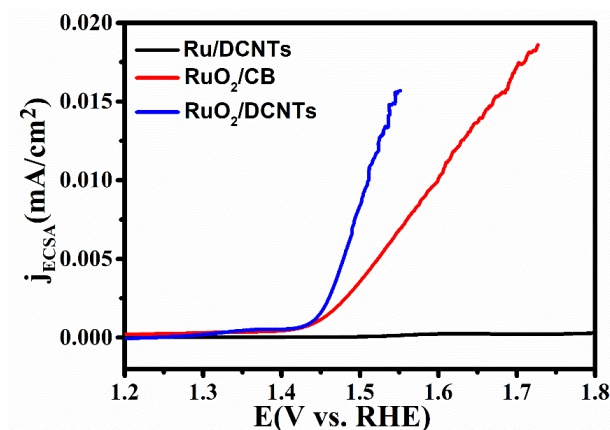

Fig. S15 The ECSA normalized OER polarization curves of the as-prepared RuO<sub>2</sub>-DNCTs, RuO<sub>2</sub>/CB and Ru-DNCTs electrocatalysts.

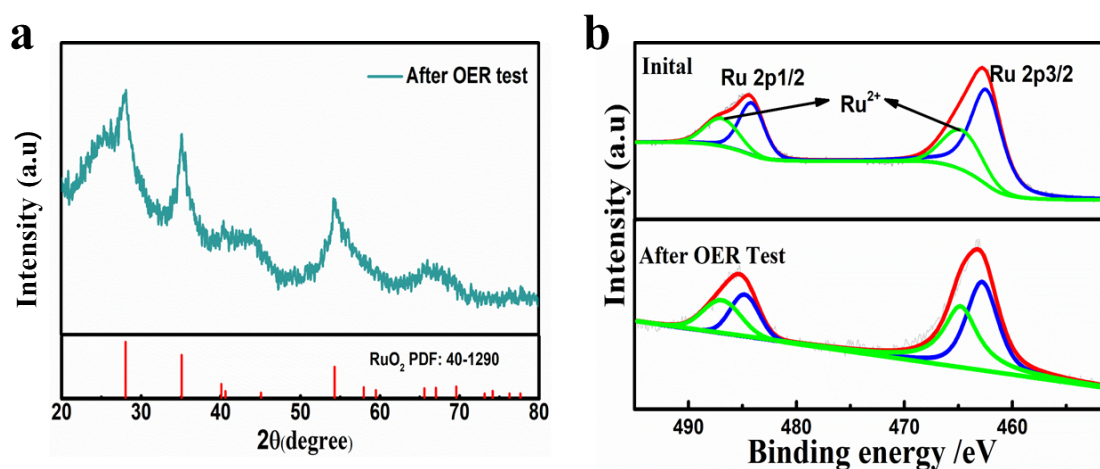

Fig. S16 X-ray diffraction pattern (XRD) and high-resolution XPS spectra of Ru 2p in RuO<sub>2</sub>-DNCTs after OER(c-d) test.

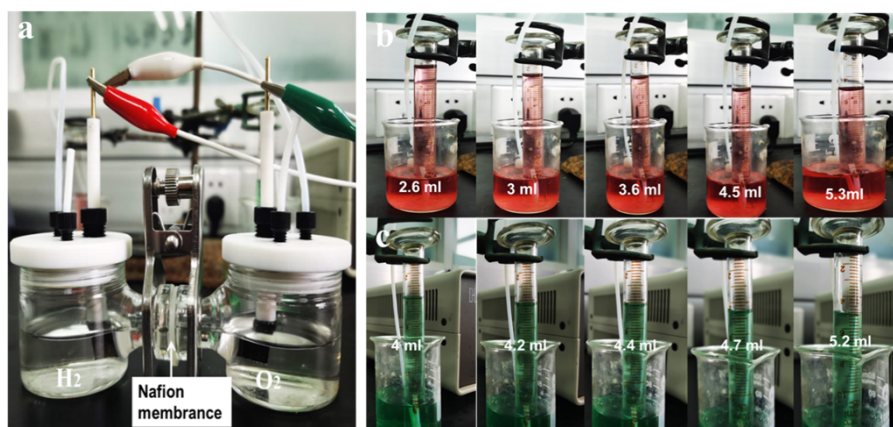

Fig. S17 (a) Gas collection device of water splitting, (b) Photographs of hydrogen and oxygen collected at different times.

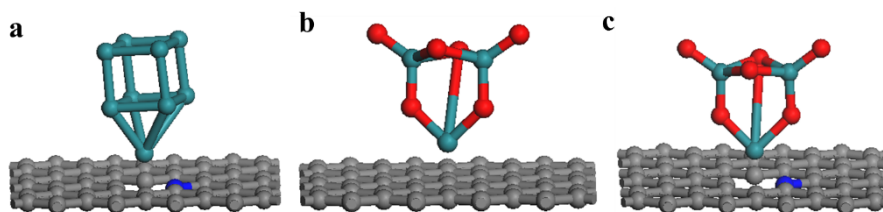

Fig. S18 (a-c) Calculated model of Ru-DNC, RuO<sub>2</sub>-C and RuO<sub>2</sub>-DNC.

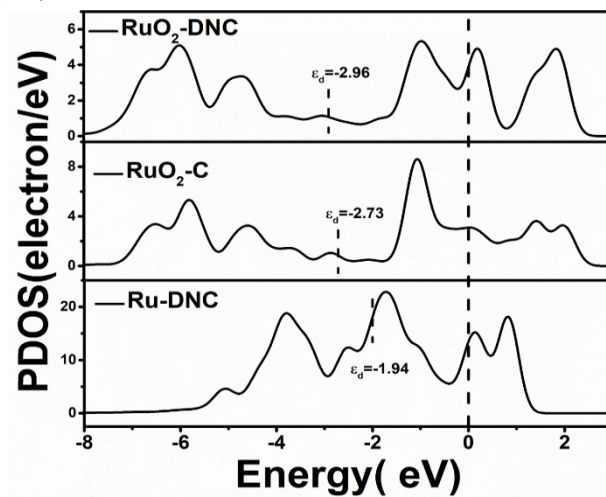

Fig. S19 Partial electronic density of states of Ru d orbital in RuO<sub>2</sub>-DNC, RuO<sub>2</sub>-C and Ru-DNC.

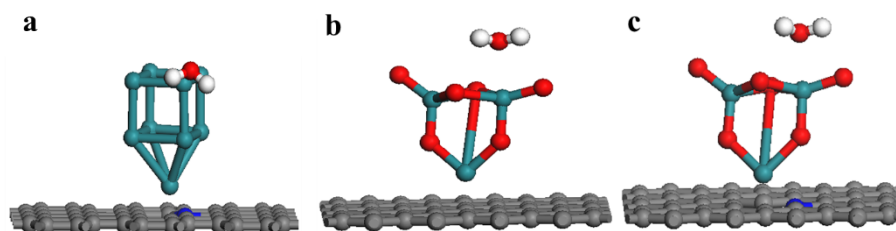

Fig. S20 Calculated model of H<sub>2</sub>O on (a) Ru-DNC, (b) RuO<sub>2</sub>-C and (c) RuO<sub>2</sub>-DNC.

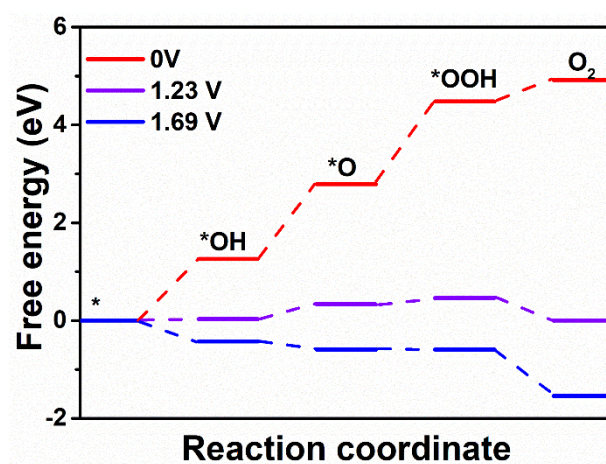

Fig. S21 Free-energy diagrams of RuO<sub>2</sub>-DNC at different potential.

Table S1. HER comparison in 1.0 M KOH with the recently reported literatures

| Materials                              | j(mA/m <sup>2</sup> ) | HER(mV) | Reference        |
|----------------------------------------|-----------------------|---------|------------------|
| <b>RuO<sub>2</sub>-DNCTs</b>           | 10                    | 19      | <b>This work</b> |
| RuO <sub>2</sub> /N-C                  | 10                    | 40      | 5                |
| Ru <sub>40</sub> @mONC                 | 10                    | 28      | 6                |
| Ru/Ni <sub>3</sub> N-Ni                | 10                    | 53      | 7                |
| RuNi-NCNFs                             | 10                    | 49      | 8                |
| RuO <sub>2</sub> -RuP <sub>2</sub> /Ru | 10                    | 33      | 9                |
| PtSA-Co(OH) <sub>2</sub> @AgNWs        | 10                    | 29      | 10               |
| IrP <sub>2</sub> @NC                   | 10                    | 28      | 11               |
| Pd <sub>3</sub> Ru/C                   | 10                    | 42      | 12               |
| RuAu SAAs                              | 10                    | 24      | 13               |
| CF@Ru-CoCH                             | 10                    | 66      | 14               |
| NiRu@N-C                               | 10                    | 32      | 15               |
| Ru-CoV-LDH/NF                          | 10                    | 32      | 16               |
| Ru-NiFe-P                              | 10                    | 44      | 17               |
| Ru-MnFeP/NF                            | 10                    | 35      | 18               |
| MIL-53(Ru-NiFe)@NF                     | 10                    | 68      | 19               |

Table S2.  $C_{dl}$  and ECSA values of RuO<sub>2</sub>-DNCTs, RuO<sub>2</sub>-C and Ru-DNCTs in the region of (0.2)- (0.3) V versus Hg/HgO

| Materials               | $C_{dl}(\text{mF}/\text{cm}^2)$ | ECSA( $\text{cm}^2$ ) |
|-------------------------|---------------------------------|-----------------------|
| RuO <sub>2</sub> -DNCTs | 17.5                            | 291                   |
| RuO <sub>2</sub> -CB    | 12.9                            | 215                   |
| Ru-DNCTs                | 10.2                            | 170                   |

Table S3. OER comparison in 1.0 M KOH with the recently reported literatures

| Materials                             | j(mA/m <sup>2</sup> ) | OER(mV) | Reference        |
|---------------------------------------|-----------------------|---------|------------------|
| <b>RuO<sub>2</sub>-DNCTs</b>          | 10                    | 229     | <b>This work</b> |
| RuIrO <sub>x</sub>                    | 10                    | 250     | 20               |
| RuO <sub>2</sub> /N-C                 | 10                    | 280     | 5                |
| RuCu NSs/C                            | 10                    | 230     | 21               |
| D-RuO <sub>2</sub> /TiO <sub>2</sub>  | 10                    | 296     | 22               |
| Ru-CoV-LDH/NF                         | 10                    | 230     | 16               |
| RuO <sub>2</sub> /CeO <sub>2</sub>    | 10                    | 350     | 23               |
| RuNi-NCNFs                            | 10                    | 290     | 8                |
| Ru/RuO <sub>2</sub> -MoO <sub>2</sub> | 10                    | 260     | 24               |
| CoNG/Ru                               | 10                    | 350     | 25               |
| 0.4-Ru@NG-750                         | 10                    | 372     | 26               |
| Co doped RuO <sub>2</sub> NWs         | 10                    | 304     | 27               |
| Ir/MoS <sub>2</sub>                   | 10                    | 330     | 28               |
| Pt-MoS <sub>2</sub> /CC               | 10                    | 300     | 29               |

Table S4. Summary of overall water-splitting electrocatalysts

| Materials                             | Overpotential ( V@10 mA/cm <sup>2</sup> ) | Reference |
|---------------------------------------|-------------------------------------------|-----------|
| <b>RuO<sub>2</sub>-DNCTs</b>          | 1.48                                      | This work |
| Ru-HMT-MP-7                           | 1.50                                      | 9         |
| D-RuO <sub>2</sub> /TiO <sub>2</sub>  | 1.59                                      | 22        |
| RuO <sub>2</sub> /N-C                 | 1.554                                     | 15        |
| Ru/NiFe LDH-F/NF                      | 1.53                                      | 30        |
| NiRu@MWCNTs                           | 1.51                                      | 31        |
| Ru/Ni <sub>3</sub> N-Ni               | 1.55                                      | 7         |
| RuNi-NCNFs                            | 1.564                                     | 8         |
| CoNG/Ru                               | 1.58                                      | 25        |
| Ru <sub>1</sub> Co <sub>2</sub> NP    | 1.59                                      | 32        |
| Ru-NiCoP                              | 1.515                                     | 33        |
| OMS Mo <sub>2</sub> C/NC-Ru           | 1.62                                      | 34        |
| Ru/RuO <sub>2</sub> -MoO <sub>2</sub> | 1.54                                      | 35        |
| RuCu NSs/C                            | 1.49                                      | 21        |

## Reference :

- 1 G. C. Xi, Y. K. Liu, X. Q. Wang, X. Y. Liu, Y. Y. Peng, Y. T. Qian, Large-scale synthesis, growth mechanism, and photoluminescence of ultrathin Te nanowires, *Cryst. Growth. Des.*, 2006, **6**, 2567-2570.
- 2 J. P. Perdew, K. Burke, M. Ernzerhof, Generalized gradient approximation made simple, *Phys. Rev. Lett.*, 1996, **77**, 3865-3868.
- 3 Y. C. Yao, S. L. Hu, W. X. Chen, Z. Q. Huang, W. C. Wei, T. Yao, R. R. Liu, K. T. Zang, X. Q. Wang, G. Wu, W. J. Yuan, T. W. Yuan, B. Q. Zhu, W. Liu, Z. J. Li, D. S. He, Z. G. Xue, Y. Wang, X. S. Zheng, J. C. Dong, C. R. Chang, Y. X. Chen, X. Hong, J. Luo, S. Q. Wei, W. X. Li, P. Strasser, Y. E. Wu, Y. D. Li, Engineering the electronic structure of single atom Ru sites via compressive strain boosts acidic water oxidation electrocatalysis, *Nat. Catal.*, 2019, **2**, 304-313.
- 4 D. Bahamon, M. Khalil, A. Belabbes, Y. Alwahedi, L. F. Vega, K. Polychronopoulou, A DFT study of the adsorption energy and electronic interactions of the SO<sub>2</sub> molecule on a CoP hydrotreating catalyst, *Rsc Adv.*, 2021, **11**, 2947-2957.
- 5 C. Z. Yuan, Y. F. Jiang, Z. W. Zhao, S. J. Zhao, X. Zhou, T. Y. Cheang, A. W. Xu, Molecule-Assisted Synthesis of Highly Dispersed Ultrasmall RuO<sub>2</sub> Nanoparticles on Nitrogen-Doped Carbon Matrix as Ultraefficient Bifunctional Electrocatalysts for Overall Water Splitting, *Acs Sustain. Chem. Eng.*, 2018, **6**, 11529-11535.
- 6 Q. F. Yang, B. T. Zhu, F. Wang, C. J. Zhang, J. H. Cai, P. Jin, L. Feng, Ru/NC heterointerfaces boost energy-efficient production of green H<sub>2</sub> over a wide pH range, *Nano Res.*, 2022, **15**, 5134-5142.
- 7 Z. Liu, M. Zha, Q. Wang, G. Hu, L. Feng, Overall water-splitting reaction efficiently catalyzed by a novel bi-functional Ru/Ni<sub>3</sub>N–Ni electrode, *Chem Commoun.*, 2020, **56**, 2352-2355.
- 8 M. X. Li, H. Y. Wang, W. D. Zhu, W. M. Li, C. Wang, X. F. Lu, RuNi Nanoparticles Embedded in N-Doped Carbon Nanofibers as a Robust Bifunctional Catalyst for Efficient Overall Water Splitting, *Adv. Sci.*, 2020, **7**, 1901833.

- 9 Y. Zhao, X. Y. Zhang, Y. X. Gao, Z. Chen, Z. J. Li, T. Y. Ma, Z. X. Wu, L. Wang, S. H. Feng, Heterostructure of RuO<sub>2</sub>-RuP<sub>2</sub>/Ru Derived from HMT-based Coordination Polymers as Superior pH-Universal Electrocatalyst for Hydrogen Evolution Reaction, *Small*, 2022, **18**, 2105168.
- 10 K. L. Zhou, C. H. Wang, Z. L. Wang, C. B. Han, Q. Q. Zhang, X. X. Ke, J. B. Liu, H. Wang, Seamlessly conductive Co(OH)<sub>2</sub> tailored atomically dispersed Pt electrocatalyst with a hierarchical nanostructure for an efficient hydrogen evolution reaction, *Energy Environ. Sci.*, 2020, **13**, 3082-3092.
- 11 Z. H. Pu, J. H. Zhao, I. S. Amiin, W. Q. Li, M. Wang, D. P. He, S. C. Mu, A universal synthesis strategy for P-rich noble metal diphosphide-based electrocatalysts for the hydrogen evolution reaction, *Energy Environ. Sci.*, 2019, **12**, 952-957.
- 12 X. P. Qin, L. L. Zhang, G. L. Xu, S. Q. Zhu, Q. Wang, M. Gu, X. Y. Zhang, C. J. Sun, P. B. Balbuena, K. Amine, M. H. Shao, The Role of Ru in Improving the Activity of Pd toward Hydrogen Evolution and Oxidation Reactions in Alkaline Solutions, *Acs Catal.*, 2019, **9**, 9614-9621.
- 13 C. H. Chen, D. Y. Wu, Z. Li, R. Zhang, C. G. Kuai, X. R. Zhao, C. K. Dong, S. Z. Qiao, H. Liu, X. W. Du, Ruthenium-Based Single-Atom Alloy with High Electrocatalytic Activity for Hydrogen Evolution, *Adv. Energy Mater.*, 2019, **9**, 1803913.
- 14 J. C. Li, Q. W. Zhou, Z. H. Shen, S. W. Li, J. Pu, C. L. Zhong, M. Q. Cao, X. Jin, H. G. Zhang, Y. Y. Wang, H. X. Ma, Synergistic effect of ultrafine nano-Ru decorated cobalt carbonate hydroxides nanowires for accelerated alkaline hydrogen evolution reaction, *Electrochim. Acta.*, 2020, **331**, 135367.
- 15 Y. Xu, S. L. Yin, C. J. Li, K. Deng, H. R. Xue, X. N. Li, H. J. Wang, L. Wang, Low-ruthenium-content NiRu nanoalloys encapsulated in nitrogen-doped carbon as highly efficient and pH-universal electrocatalysts for the hydrogen evolution reaction, *J Mater. Chem. A*, 2018, **6**, 1376-1381.
- 16 W. Li, B. M. Feng, L. Y. Yi, J. Y. Li, W. H. Hu, Highly Efficient Alkaline Water Splitting with Ru-Doped Co-V Layered Double Hydroxide Nanosheets as a



Bifunctional Electrocatalyst, *ChemSusChem*, 2021, **14**, 730-737.

- 17 M. J. Qu, Y. M. Jiang, M. Yang, S. Liu, Q. F. Guo, W. Shen, M. Li, R.X. He, Regulating electron density of NiFe-P nanosheets electrocatalysts by a trifle of Ru for high-efficient overall water splitting, *Appl. Catal. B-Environ.*, 2020, **263**, 118324.
- 18 D. Chen, Z. H. Pu, R. H. Lu, P. X. Ji, P. Y. Wang, J. W. Zhu, C. Lin, H. W. Li, X. G. Zhou, Z. Y. Hu, F. J. Xia, J. S. Wu, S. C. Mu, Ultralow Ru Loading Transition Metal Phosphides as High-Efficient Bifunctional Electrocatalyst for a Solar-to-Hydrogen Generation System, *Adv. Energy Mater.*, 2020, **10**, 2000814.
- 19 M. Zhao, H. L. Li, W. Li, J. Y. Li, L.Y. Yi, W. H. Hu, C. M. Li, Ru-Doping Enhanced Electrocatalysis of Metal-Organic Framework Nanosheets toward Overall Water Splitting, *Chem-Eur. J.*, 2020, **26**, 17091-17096.
- 20 Z. W. Zhuang, Y. Wang, C. Q. Xu, S. J. Liu, C. Chen, Q. Peng, Z. B. Zhuang, H. Xiao, Y. Pan, S. Q. Lu, R. Yu, W. C. Cheong, X. Cao, K. L. Wu, K. A. Sun, D. S. Wang, J. Li, Y. D. Li, Three-dimensional open nano-netcage electrocatalysts for efficient pH-universal overall water splitting, *Nat. Commun.*, 2019, **10**, 4875.
- 21 Q. Yao, B.L. Huang, N. Zhang, M.Z. Sun, Q. Shao, X.Q. Huang, Channel-Rich RuCu Nanosheets for pH-Universal Overall Water Splitting Electrocatalysis, *Angew Chem. Int. Edit.*, 2019, **58**, 13983-13988.
- 22 W. Q. Li, H. Zhang, M. Z. Hong, L. L. Zhang, X. Feng, M. F. Shi, W. X. Hu, S. C. Mu, Defective RuO<sub>2</sub>/TiO<sub>2</sub> nano-heterostructure advances hydrogen production by electrochemical water splitting, *Chem. Eng. J.*, 2022, **431**, 134072.
- 23 S. M. Galani, A. Mondal, D. N. Srivastava, A. B. Panda, Development of RuO<sub>2</sub>/CeO<sub>2</sub> heterostructure as an efficient OER electrocatalyst for alkaline water splitting, *Int. J Hydrogen Energ.*, 2020, **45**, 18635-18644.
- 24 Y. X. Fan, X. D. Zhang, Y. J. Zhang, X. Xie, J. Ding, J. L. Cai, B. J. Li, H. L. Lv, L. Y. Liu, M. M. Zhu, X. C. Zheng, Q. Cai, Y. S. Liu, S. Y. Lu, Decoration of Ru/RuO<sub>2</sub> hybrid nanoparticles on MoO<sub>2</sub> plane as bifunctional electrocatalyst for overall water splitting, *J Colloid Interf. Sci.*, 2021, **604**, 508-516.
- 25 T. He, Y. Peng, Q.X. Jia, J.E. Lu, Q.M. Liu, R. Mercado, Y. Chen, F. Nichols, Y.

- Zhang, S.W. Chen, Nanocomposites Based on Ruthenium Nanoparticles Supported on Cobalt and Nitrogen-Codoped Graphene Nanosheets as Bifunctional Catalysts for Electrochemical Water Splitting, *Acs Appl. Mater. Inter.*, 2019, **11**, 46912-46919.
- 26 L. Bai, Z. Y. Duan, X. D. Wen, R. Si, Q. Q. Zhang, J. Q. Guan, Highly Dispersed Ruthenium-Based Multifunctional Electrocatalyst, *Acs Catal.*, 2019, **9**, 9897-9904.
- 27 J. Wang, Y. J. Ji, R. G. Yin, Y. Y. Li, Q. Shao, X. Q. Huang, Transition metal-doped ultrathin RuO<sub>2</sub> networked nanowires for efficient overall water splitting across a broad pH range, *J Mater. Chem. A*, 2019, **7**, 6411-6416.
- 28 X. P. Han, X. Y. Wu, Y. D. Deng, J. Liu, J. Lu, C. Zhong, W. B. Hu, Ultrafine Pt Nanoparticle-Decorated Pyrite-Type CoS<sub>2</sub> Nanosheet Arrays Coated on Carbon Cloth as a Bifunctional Electrode for Overall Water Splitting, *Adv. Energy Mater.*, 2018, **8**, 1800935.
- 29 S. T. Wei, X. Q. Cui, Y. C. Xu, B. Shang, Q. H. Zhang, L. Gu, X. F. Fan, L. R. Zheng, C. M. Hou, H. H. Huang, S. S. Wen, W. T. Zheng, Iridium-Triggered Phase Transition of MoS<sub>2</sub> Nanosheets Boosts Overall Water Splitting in Alkaline Media, *ACS Energy Lett.*, 2019, **4**, 368-374.
- 30 J. Q. Chi, X. Y. Zhang, X. Ma, B. Dong, J. Q. Zhang, B. Y. Guo, M. Yang, L. Wang, Y. M. Chai, C. G. Liu, Interface Charge Engineering of Ultrafine Ru/Ni<sub>2</sub>P Nanoparticles Encapsulated in N,P-Codoped Hollow Carbon Nanospheres for Efficient Hydrogen Evolution, *ACS Sustain. Chem. Eng.*, 2019, **7**, 17714-17722.
- 31 Z. K. Peng, J. M. Liu, B. Hu, Y.P. Yang, Y. Q. Guo, B. J. Li, L. Li, Z. H. Zhang, B. B. Cui, L. H. He, M. Du, Surface Engineering on Nickel-Ruthenium Nanoalloys Attached Defective Carbon Sites as Superior Bifunctional Electrocatalysts for Overall Water Splitting, *Acs Appl. Mater. Inter.*, 2020, **12**, 13842-13851.
- 32 Y. K. Bao, J. Y. Dai, J. Zhao, Y. Wu, C. Li, L. F. Ji, X. Zhang, F. C. Yang, Modulation in Ruthenium-Cobalt Electronic Structure for Highly Efficient Overall Water Splitting, *Acs Appl. Energy Mater.*, 2020, **3**, 1869-1874.
- 33 K. Yang, P. P. Xu, Z. Y. Lin, Y. Yang, P. Jiang, C. L. Wang, S. Liu, S. P. Gong, L. Hu, Q. W. Chen, Ultrasmall Ru/Cu-doped RuO<sub>2</sub> Complex Embedded in

Amorphous Carbon Skeleton as Highly Active Bifunctional Electrocatalysts for Overall Water Splitting, *Small*, 2018, **14**, 1803009.

- 34 K. X. Wang, S. Wang, K. S. Hui, H. X. Gao, D. A. Dinh, C. Z. Yuan, C. Y. Zha, Z. P. Shao, Z. K. Tang, K. N. Hui, Synergistically boosting the elementary reactions over multiheterogeneous ordered macroporous Mo<sub>2</sub>C/NC-Ru for highly efficient alkaline hydrogen evolution, *Carbon Energy*, 2022, **4**, 856-866.
- 35 Y. Fan, X. Zhang, Y. Zhang, X. Xie, J. Ding, J. Cai, B. Li, H. Lv, L. Liu, M. Zhu, Decoration of Ru/RuO<sub>2</sub> hybrid nanoparticles on MoO<sub>2</sub> plane as bifunctional electrocatalyst for overall water splitting, *J Colloid Interf. Sci.*, 2021, **604**, 508-516.
